# Supplementary material for: MetaHiC phage-bacteria infection network reveals active cycling phages of the healthy human gut
Source: eLife. 2021 Feb 26;10:e60608. doi: 10.7554/eLife.60608 (PMC7963479; doi:10.7554/eLife.60608)
Supplement: Supplementary file 1. — Table indicating different metrics of the 10 sample and the resulting libraries and assemblies. [file elife-60608-supp1.xlsx]

## Sheet: Feuil1
Id	sex	age	enzyme	raw PE-reads (2x75 bp)	filtered PE-reads	assembly (contigs > 500 bp)
						size (bp)	contigs	N50 (bp)
17006	F	19	HpaII	69115370	64215120	242050174	96872	8631
			MluCI	58557235	55067270
16026	M	20	HpaII	62344476	57625084	299556023	132589	4642
			MluCI	66017028	61742909
10015	F	26	HpaII	48226880	46076874	228816554	99416	4674
			MluCI	45253636	43440164
16021	F	28	HpaII	88144160	83223643	321521194	116351	8066
			MluCI	105816172	96257997
8015	F	64	HpaII	47079274	45855674	318332624	137809	5031
			MluCI	46985066	45988957
7016	M	64	HpaII	48666658	47158690	339356582	166960	3857
			MluCI	49606315	48419453
8016	F	69	HpaII	71046963	69086479	337623345	143613	5535
			MluCI	61331543	59687922
7020	M	73	HpaII	53137532	51450802	430993887	199668	4126
			MluCI	74379917	72428112
16016	F	35	HpaII	59333139	55876445	314197889	140409	5418
			MluCI	72673730	68783443
9010	F	60	HpaII	210604009	206957360	617881257	251469	5600
			MluCI	202789023	198771314
