# Supplementary material for: MetaHiC phage-bacteria infection network reveals active cycling phages of the healthy human gut
Source: eLife. 2021 Feb 26;10:e60608. doi: 10.7554/eLife.60608 (PMC7963479; doi:10.7554/eLife.60608)
Supplement: Supplementary file 2. — Table indicating different statistics on PE reads mapping and 3D ratio. [file elife-60608-supp2.xlsx]

## Sheet: Feuil1
		HpaII				MluCI
id	protocol	initial PE-reads	mapped PE-reads (no ambiguous, MQ >= 20)	inter-contig contacts	ratio	raw PE-reads	mapped PE-reads (no ambiguous, MQ >= 20)	inter-contig contacts	ratio
17006	meta3C	64215120	52188432	1814822	0.0347744	55067270	45819103	877448	0.0191503
16026	meta3C	57625084	44338605	1865567	0.0420755	61742909	46525292	2683307	0.0576742
16021	meta3C	83223643	68588525	2965637	0.0432381	96257997	79930032	2670294	0.0334079
7016	meta3C	47158690	33967366	3246134	0.0955663	48419453	34058489	4966086	0.145811
10015	meta3C	46076874	36518505	3068991	0.0840393	43440164	34626773	3407767	0.0984142
8016	meta3C	69086479	53997499	3449134	0.0638758	59687922	45886287	3692661	0.0804742
7020	meta3C	51450802	39341412	3416173	0.086834	72428112	53064475	6717028	0.126582
16016	meta3C	55876445	41174584	1845660	0.0448252	68783443	51429206	2648451	0.051497
	metaHiC I	50594809	36616746	5461001	0.149139	83950053	62699625	3729559	0.059483
	metaHiC II	56547704	41275697	14656321	0.355084	54928484	39234632	9518156	0.242596
8015	meta3C	45855674	35854912	4299603	0.119917	45988957	35853789	4403148	0.122808
	metaHiC II	46798561	35766449	10458282	0.292405	47865235	34480748	8749989	0.253764
9010	meta3C	206957360	169153016	15305524	0.0904833	198771314	161725492	12284430	0.0759585
	metaHiC II	102203764	89489651	36891289	0.412241	113637817	78267233	28188719	0.36016
