# Supplementary material for: MetaHiC phage-bacteria infection network reveals active cycling phages of the healthy human gut
Source: eLife. 2021 Feb 26;10:e60608. doi: 10.7554/eLife.60608 (PMC7963479; doi:10.7554/eLife.60608)
Supplement: Supplementary file 3. — Table containing informations on the different detected crAss-like phage contigs. [file elife-60608-supp3.xlsx]

## Sheet: Feuil1
contig_id	candidate genus	Circular signal (VirSorter)	Circular signal (3C)	Patient	associated MAG	MAG_order	MAG_family	MAG_genus	MAG_species
NODE_155797_length_98356	1	yes	yes	9010	9010_37_3	Bacteroidales	Bacteroidaceae	Bacteroides	Bacteroides_vulgatus
NODE_139257_length_96367	1	no	yes	16021	16021_7_4	Bacteroidales	Bacteroidaceae	Bacteroides	Bacteroides_uniformis
NODE_187311_length_98785	6	yes	yes	10015	10015_14_1	Bacteroidales	Prevotellaceae	Prevotella	NA
NODE_3170_length_90807	3	no	weak	10015	10015_14_1	Bacteroidales	Prevotellaceae	Prevotella	NA
NODE_261249_length_165920	6	yes	yes	16016	16016_40_0	Bacteroidales	Porphyromonadaceae	NA	NA
NODE_96653_length_171503	6	yes	yes	16016	16016_40_0	Bacteroidales	Porphyromonadaceae	NA	NA
NODE_36012_length_81090	5	no	no	16021	16021_7_4	Bacteroidales	Bacteroidaceae	Bacteroides	Bacteroides_uniformis
NODE_21503_length_155486	4	no	weak	16016	16016_2_1	Bacteroidales	Porphyromonadaceae	NA	NA
NODE_187614_length_147377	4	yes	yes	10015	10015_14_1	Bacteroidales	Prevotellaceae	Prevotella	NA
NODE_109606_length_86591	3	yes	yes	9010	9010_2_3	Bacteroidales	Bacteroidaceae	Bacteroides	Bacteroides_thetaiotaomicron
NODE_16575_length_84552	3	no	yes	16016	16016_3_2	Bacteroidales	Bacteroidaceae	Bacteroides	Bacteroides_uniformis
NODE_90322_length_104697	3	yes	yes	8016	8016_14_4	Bacteroidales	Prevotellaceae	Prevotella	NA
NODE_83766_length_104697	3	yes	yes	16026	16026_7_4	Bacteroidales	Prevotellaceae	Prevotella	NA
NODE_226433_length_104650	3	yes	yes	7020	7020_3_7	Bacteroidales	Prevotellaceae	Prevotella	NA
NODE_209658_length_135027	1	no	no	16021	16021_7_2	Bacteroidales	Bacteroidaceae	Bacteroides	Bacteroides_ovatus
NODE_143986_length_96458	1	no	no	16021	16021_7_2	Bacteroidales	Bacteroidaceae	Bacteroides	Bacteroides_ovatus
NODE_362005_length_58125	1	no	no	9010	9010_2_11	Bacteroidales	Bacteroidaceae	Bacteroides	NA
