# Supplementary figures and images for: MetaHiC phage-bacteria infection network reveals active cycling phages of the healthy human gut
Source: eLife journal article supplement (doi:10.7554/elife.60608), 2021-02-26

**Figure 1 - figure supplement 2**

**a**

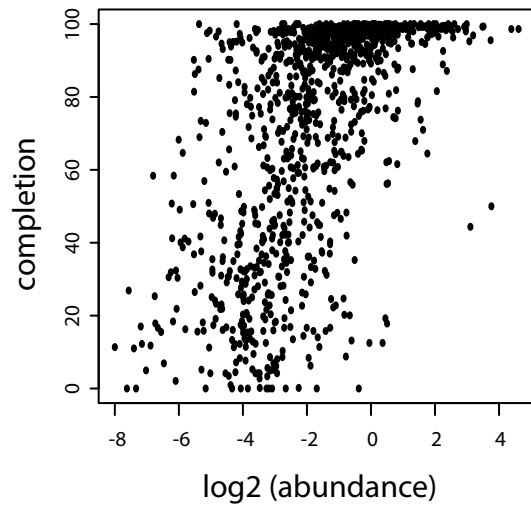

**b**

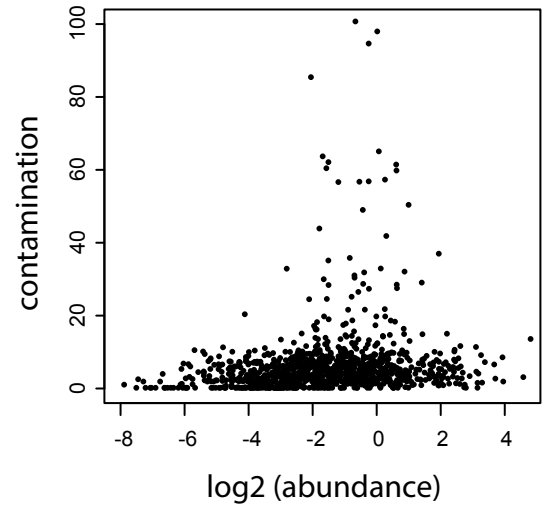

Supplement: supp [file elife-60608-supp-v1.zip]

Figure 5 - figure supplement 1

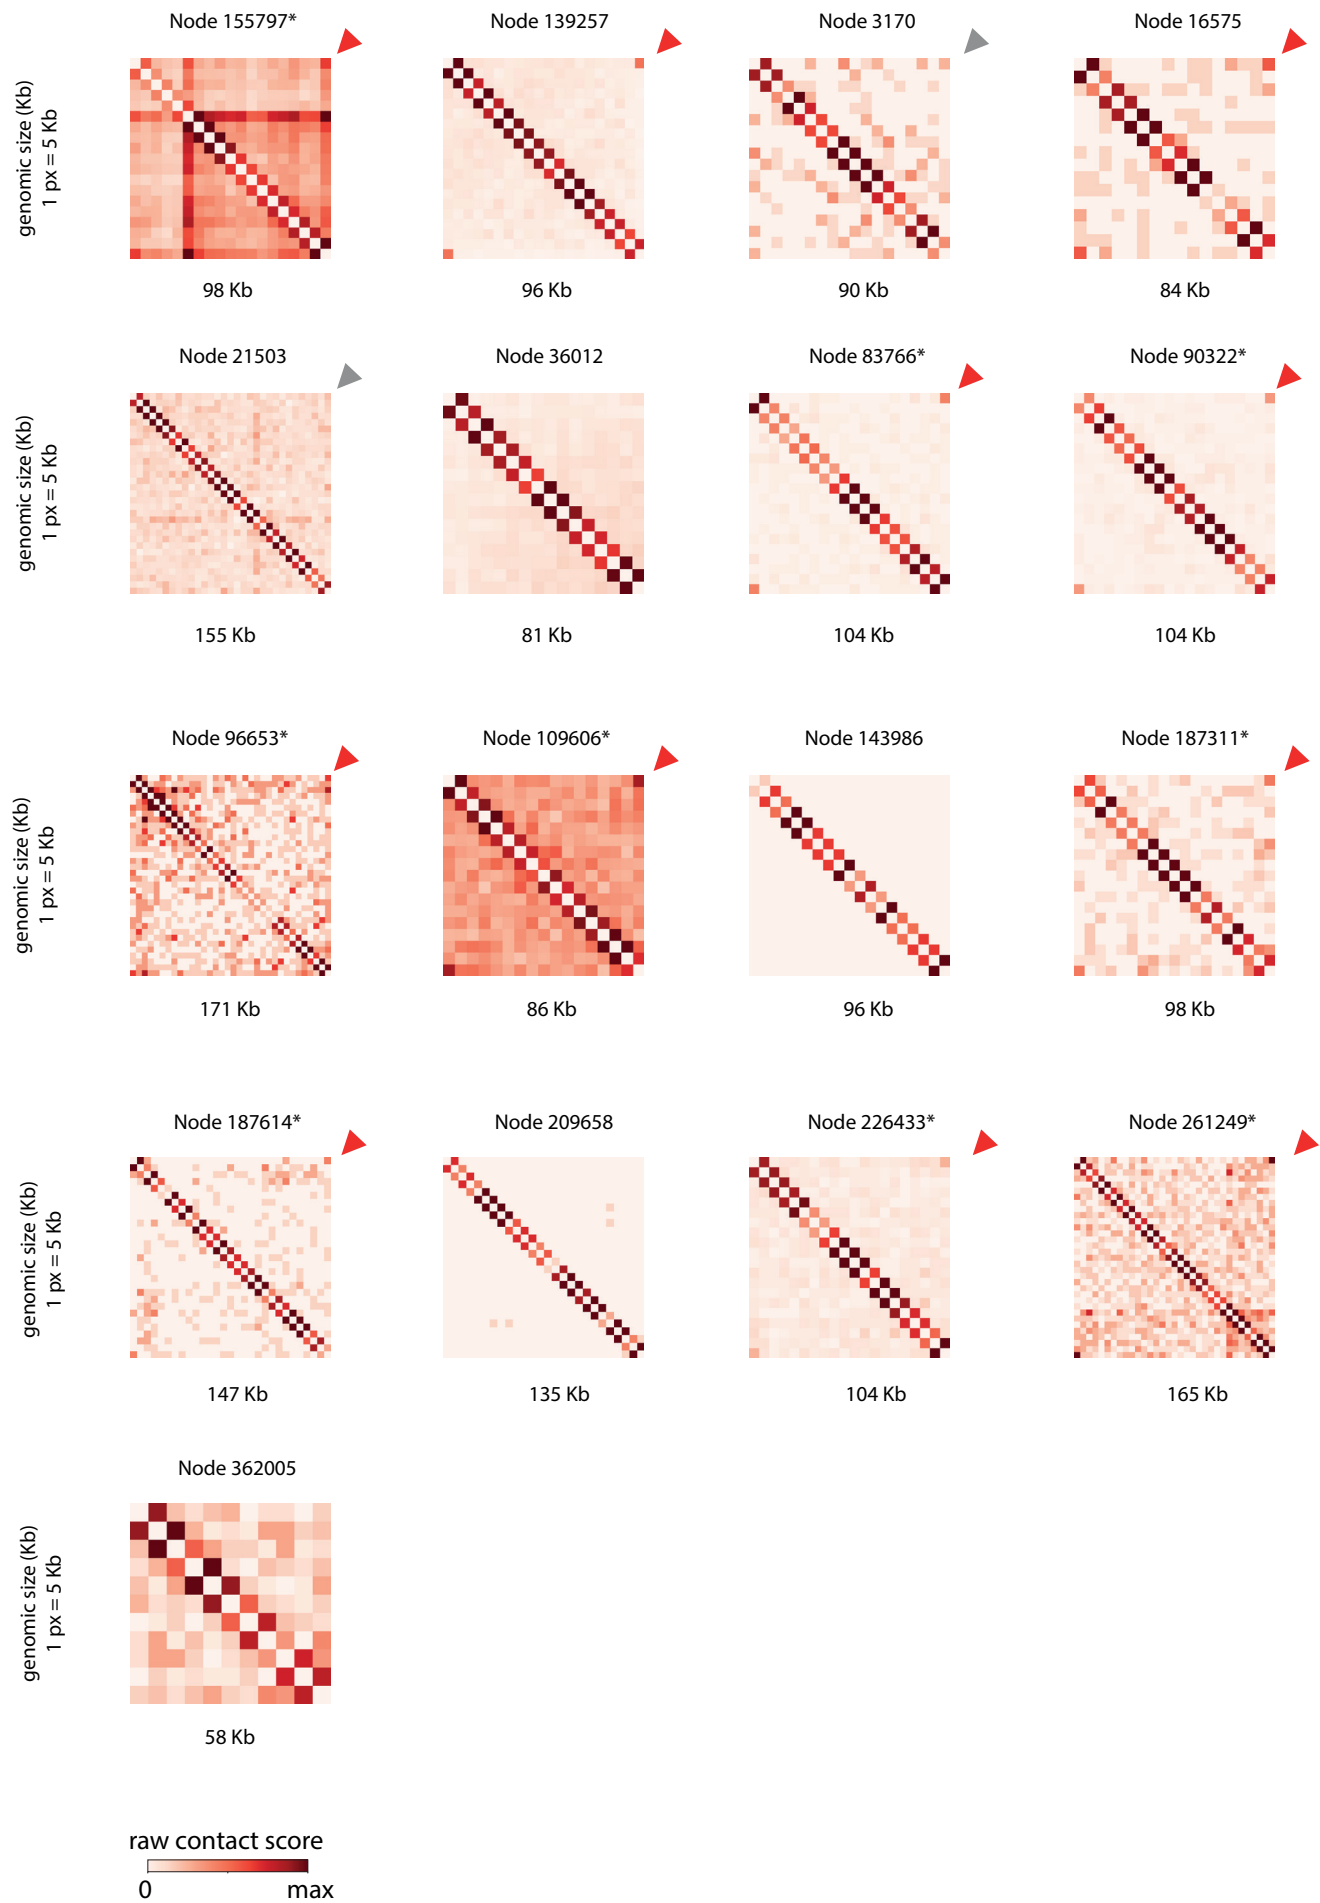

Supplement: supp [file elife-60608-supp-v1.zip]

Figure 1 - figure supplement 1

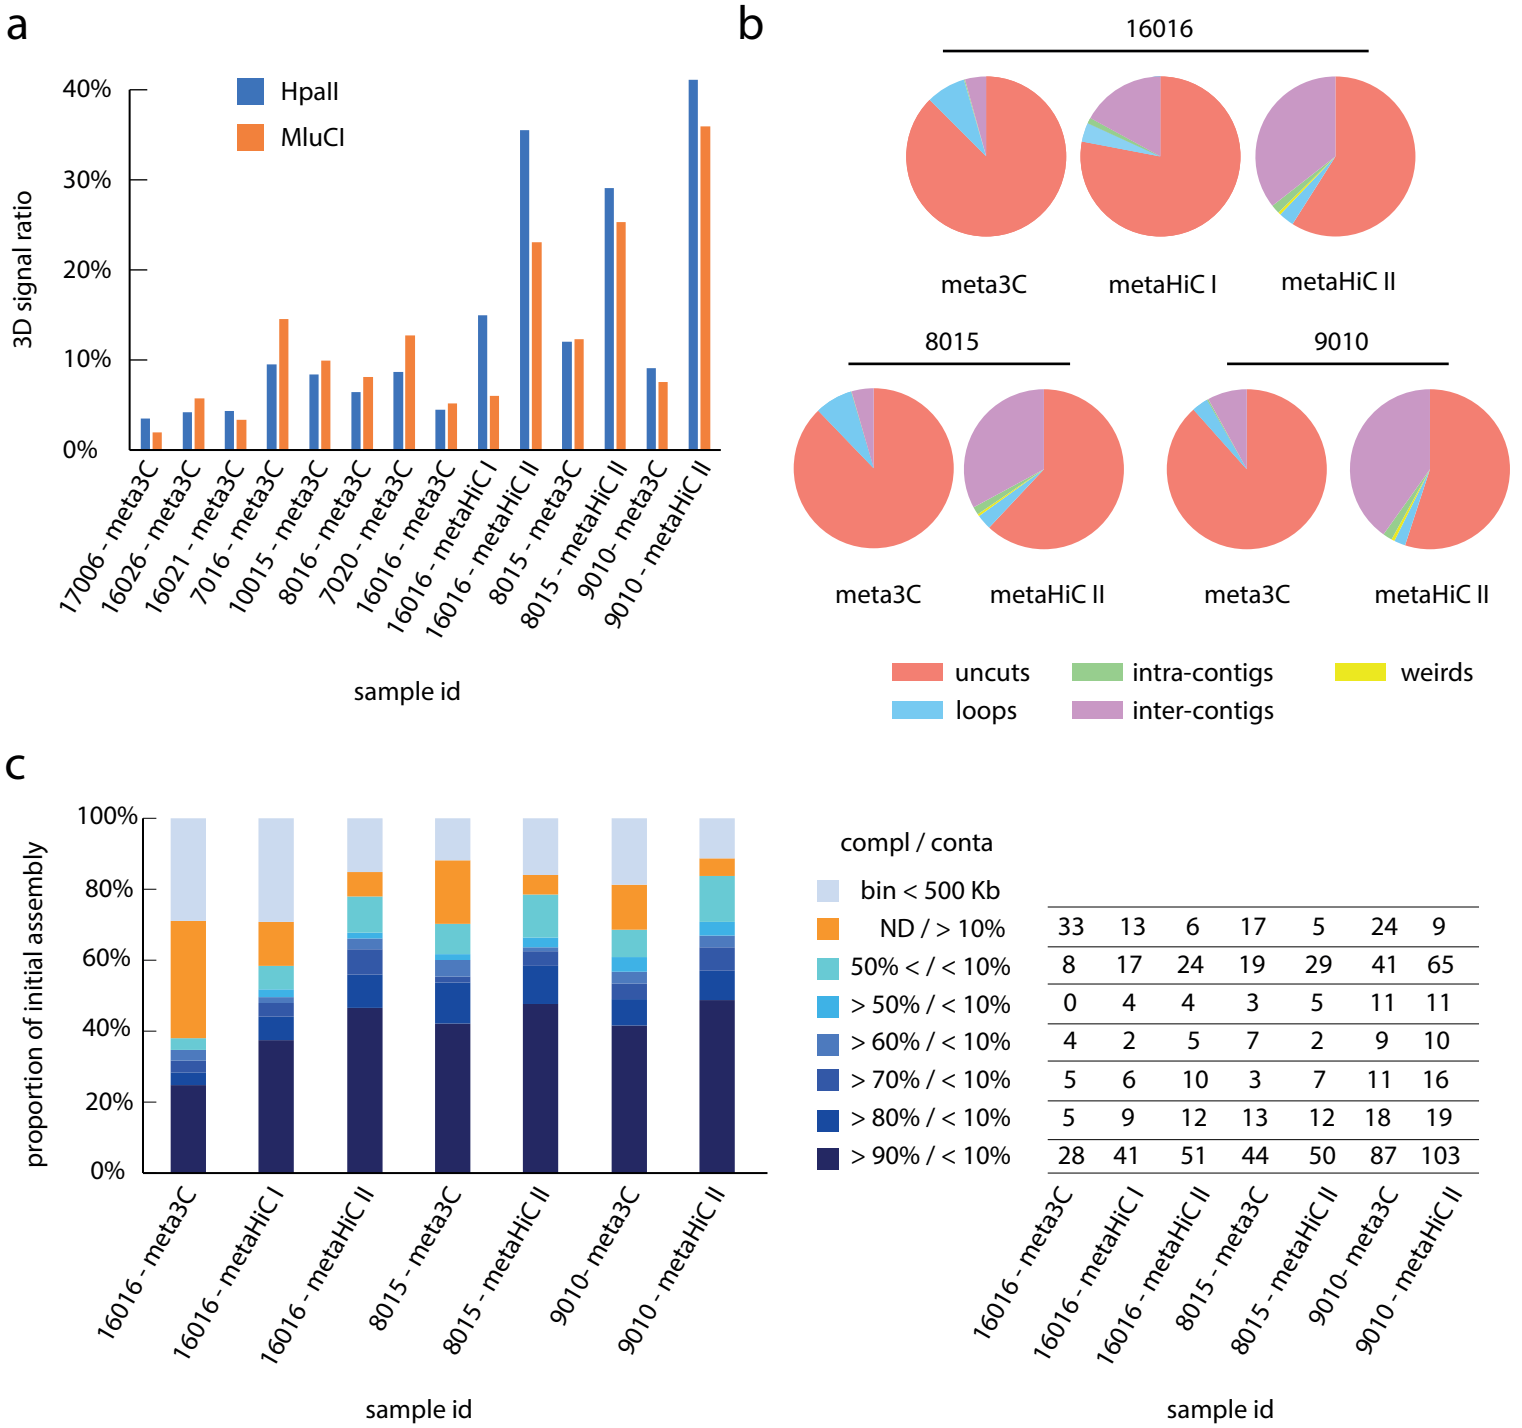

Supplement: supp [file elife-60608-supp-v1.zip]

Figure 3 - figure supplement 2

a

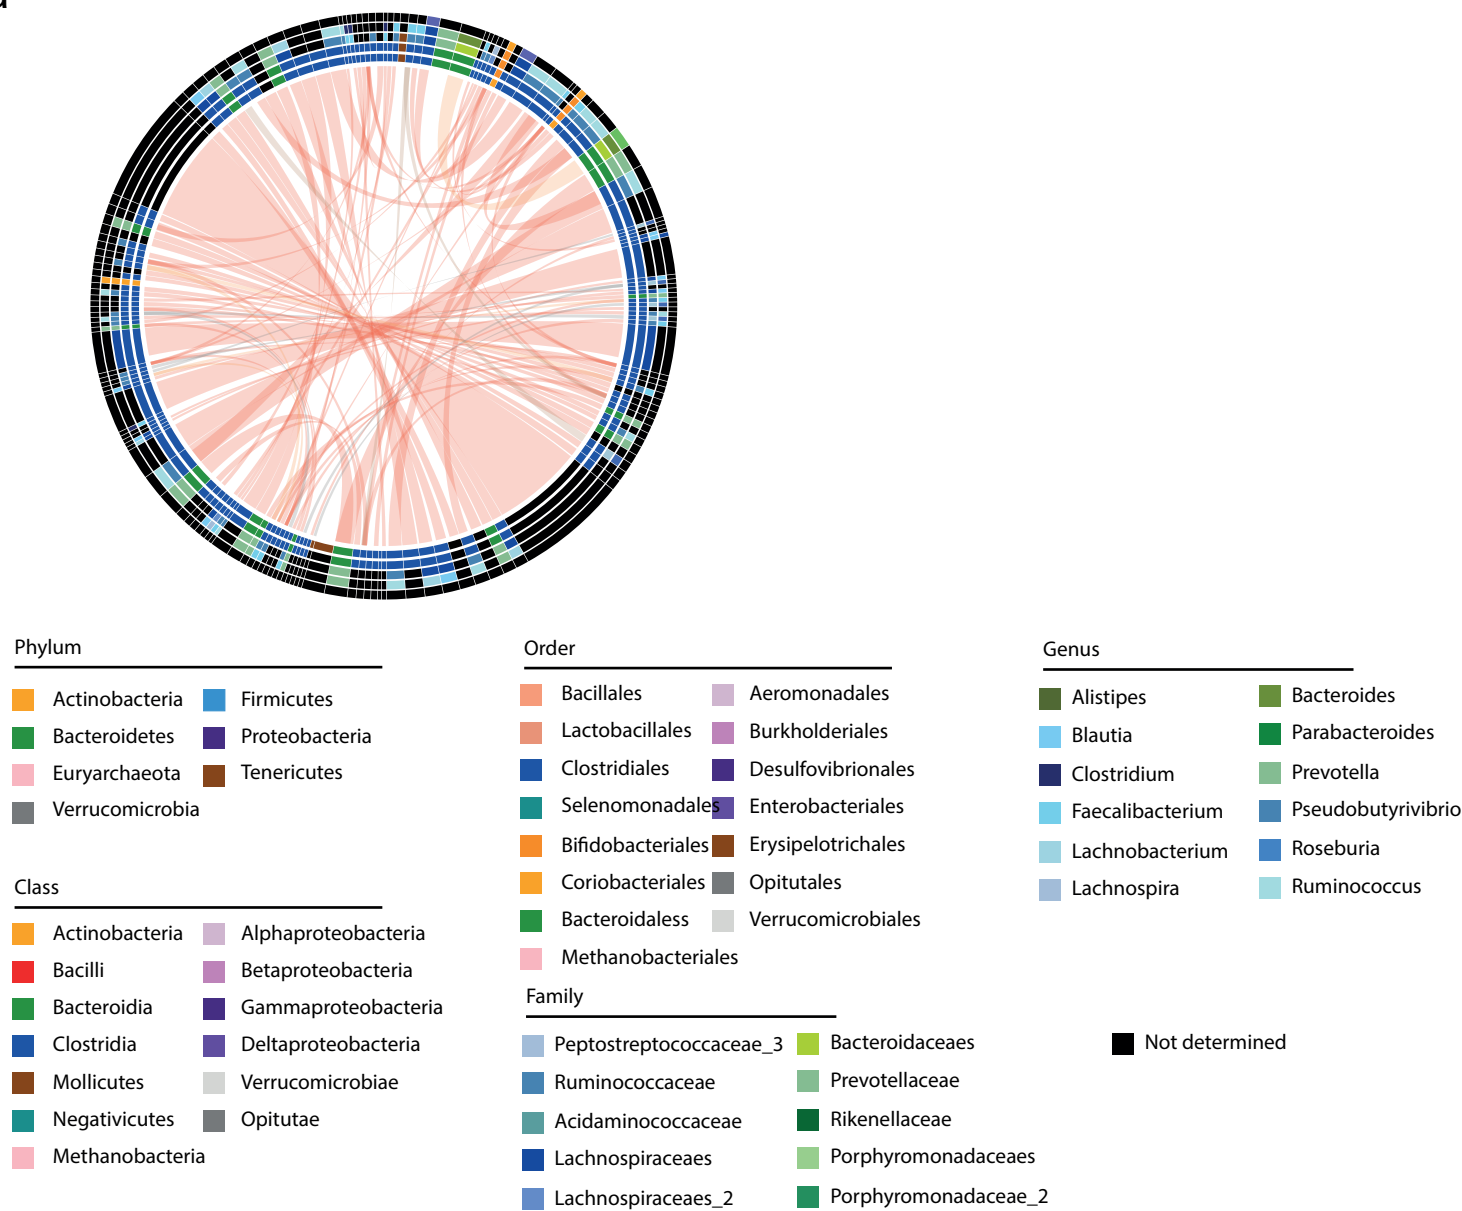

b

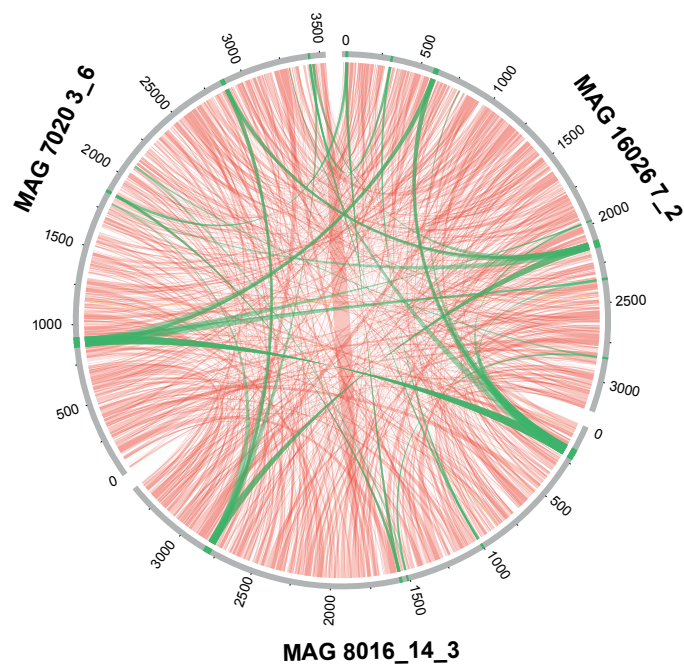

Supplement: supp [file elife-60608-supp-v1.zip]

**Figure 3 - figure supplement 1**

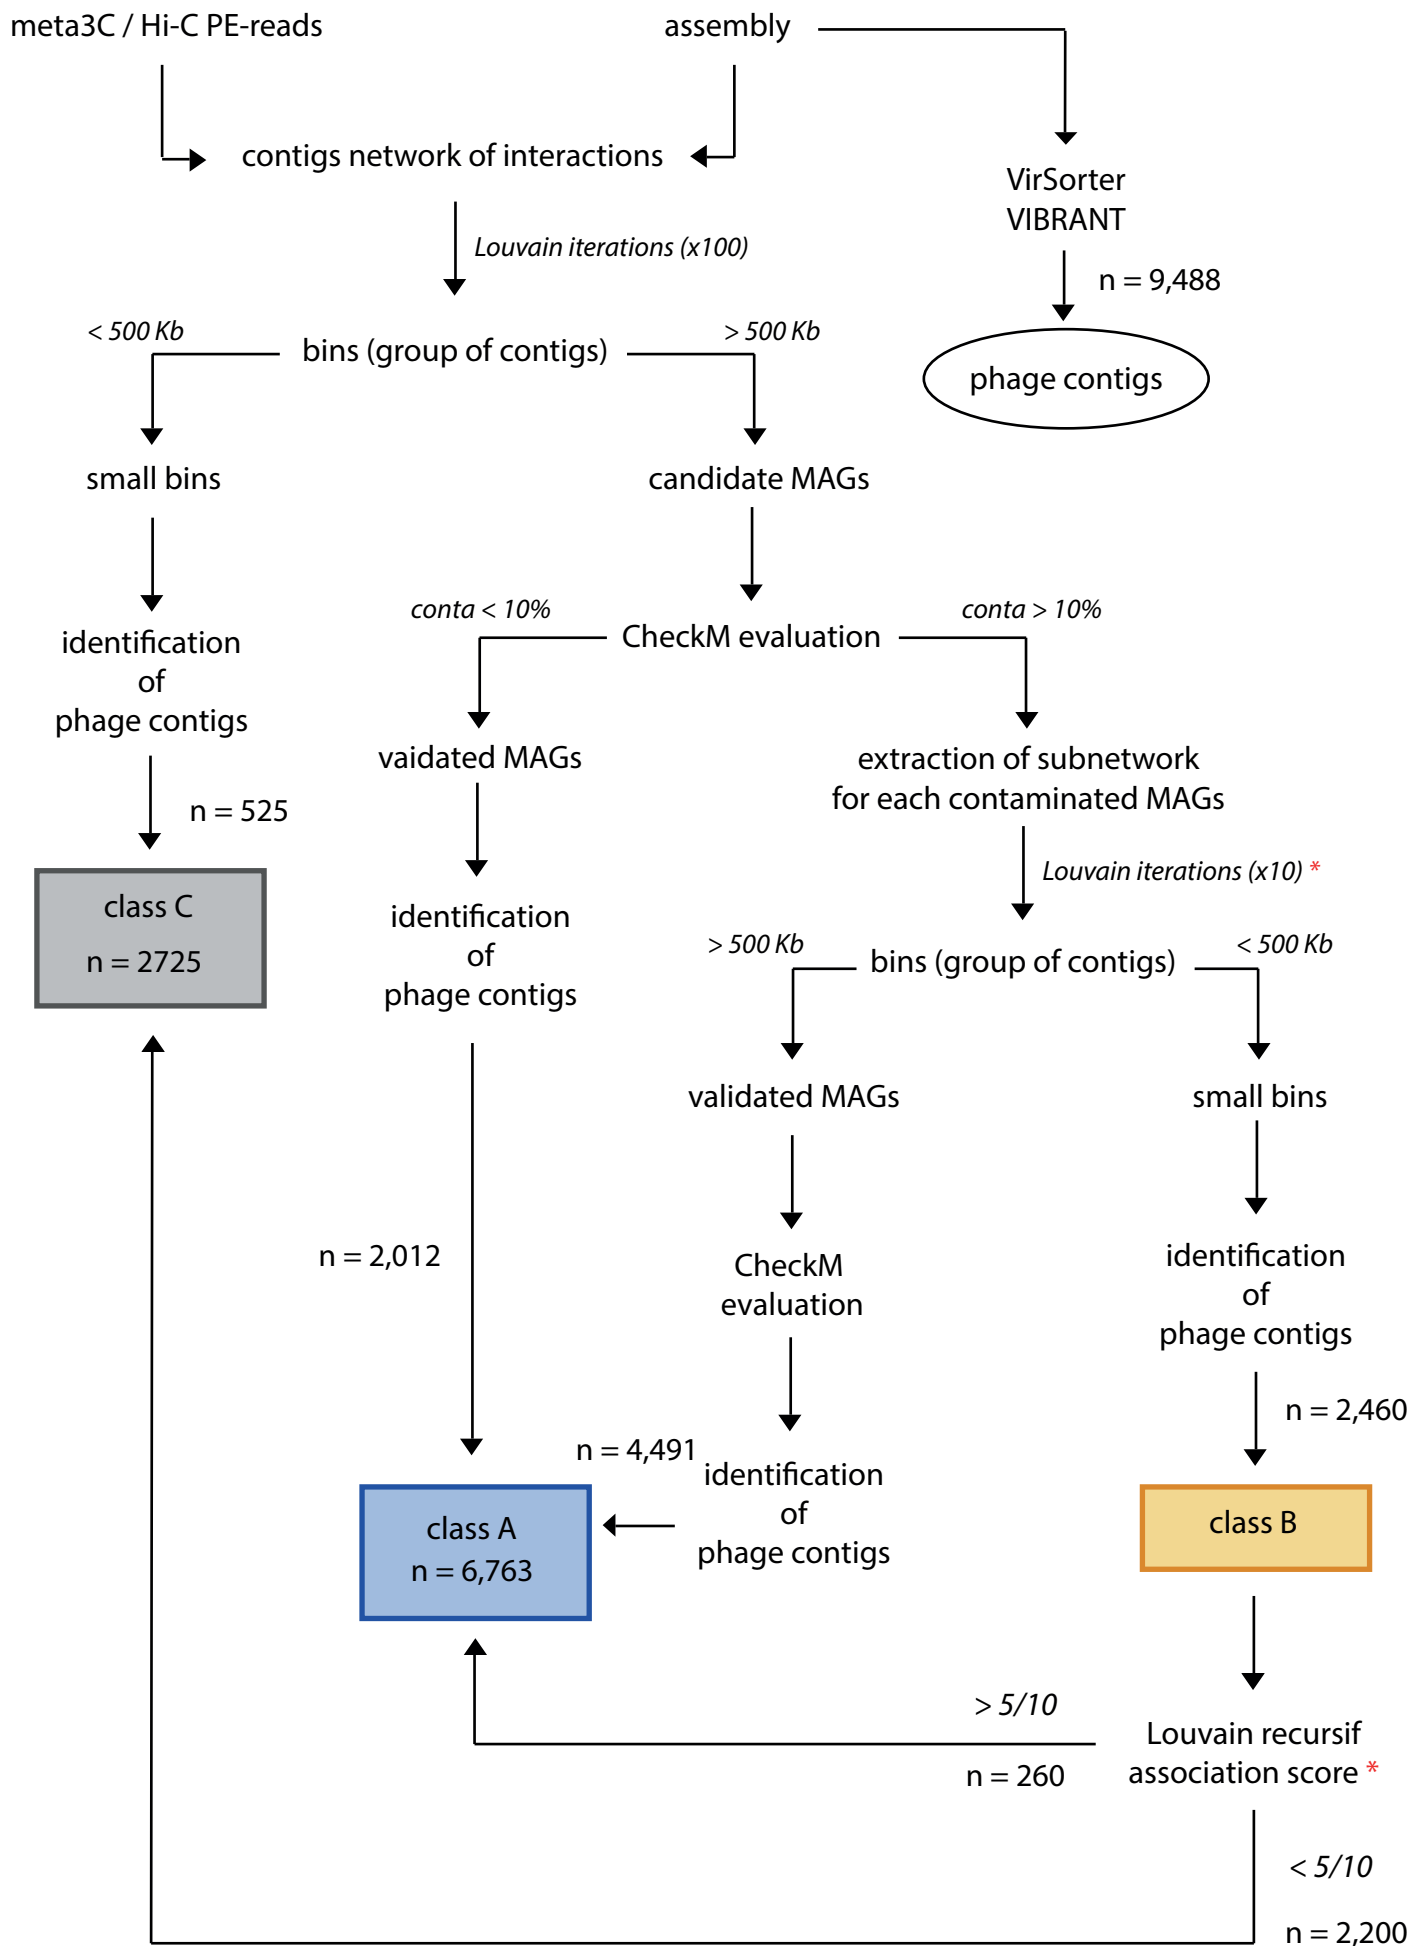

Supplement: supp [file elife-60608-supp-v1.zip]

**Figure 4 - figure supplement 1**

**a**

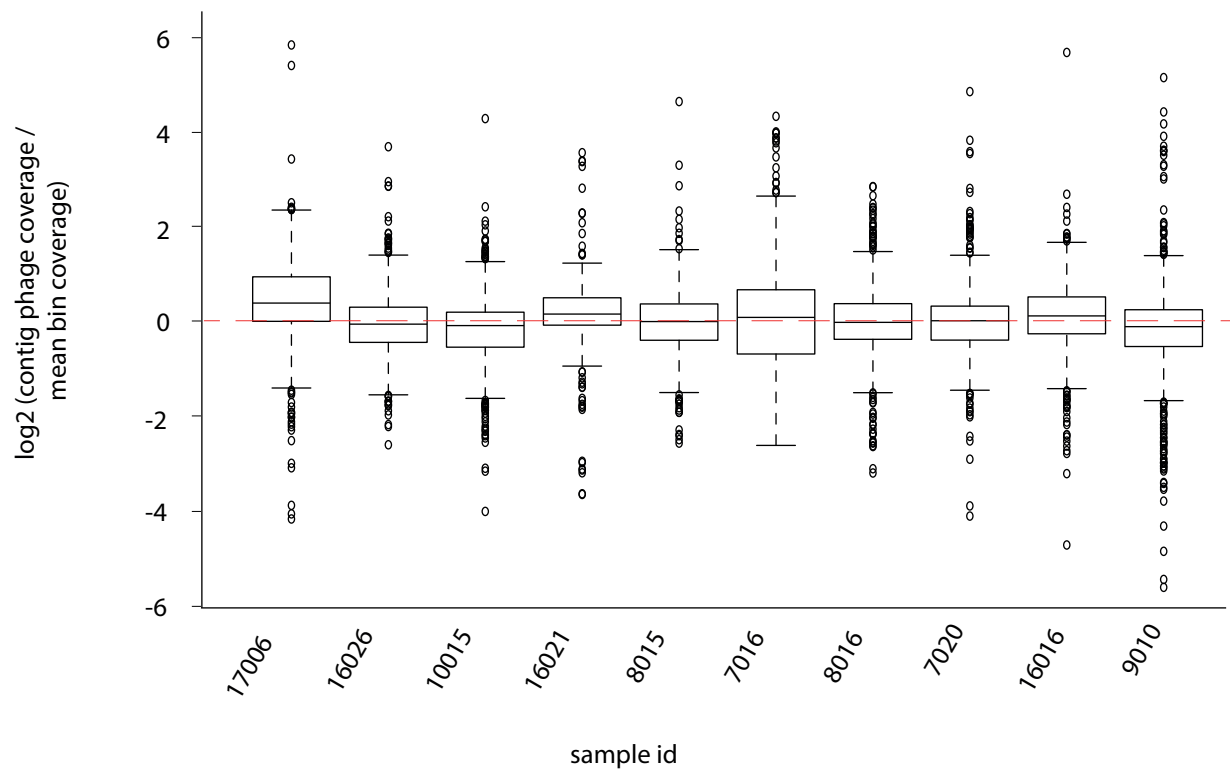

**b**

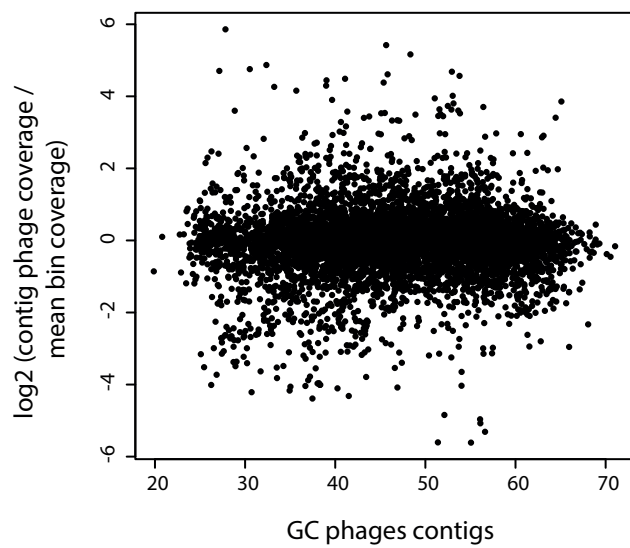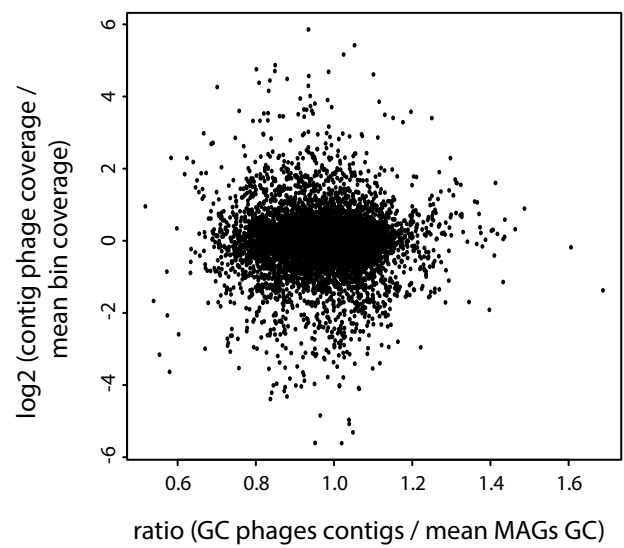

Supplement: supp [file elife-60608-supp-v1.zip]

Figure 2 - figure supplement 1

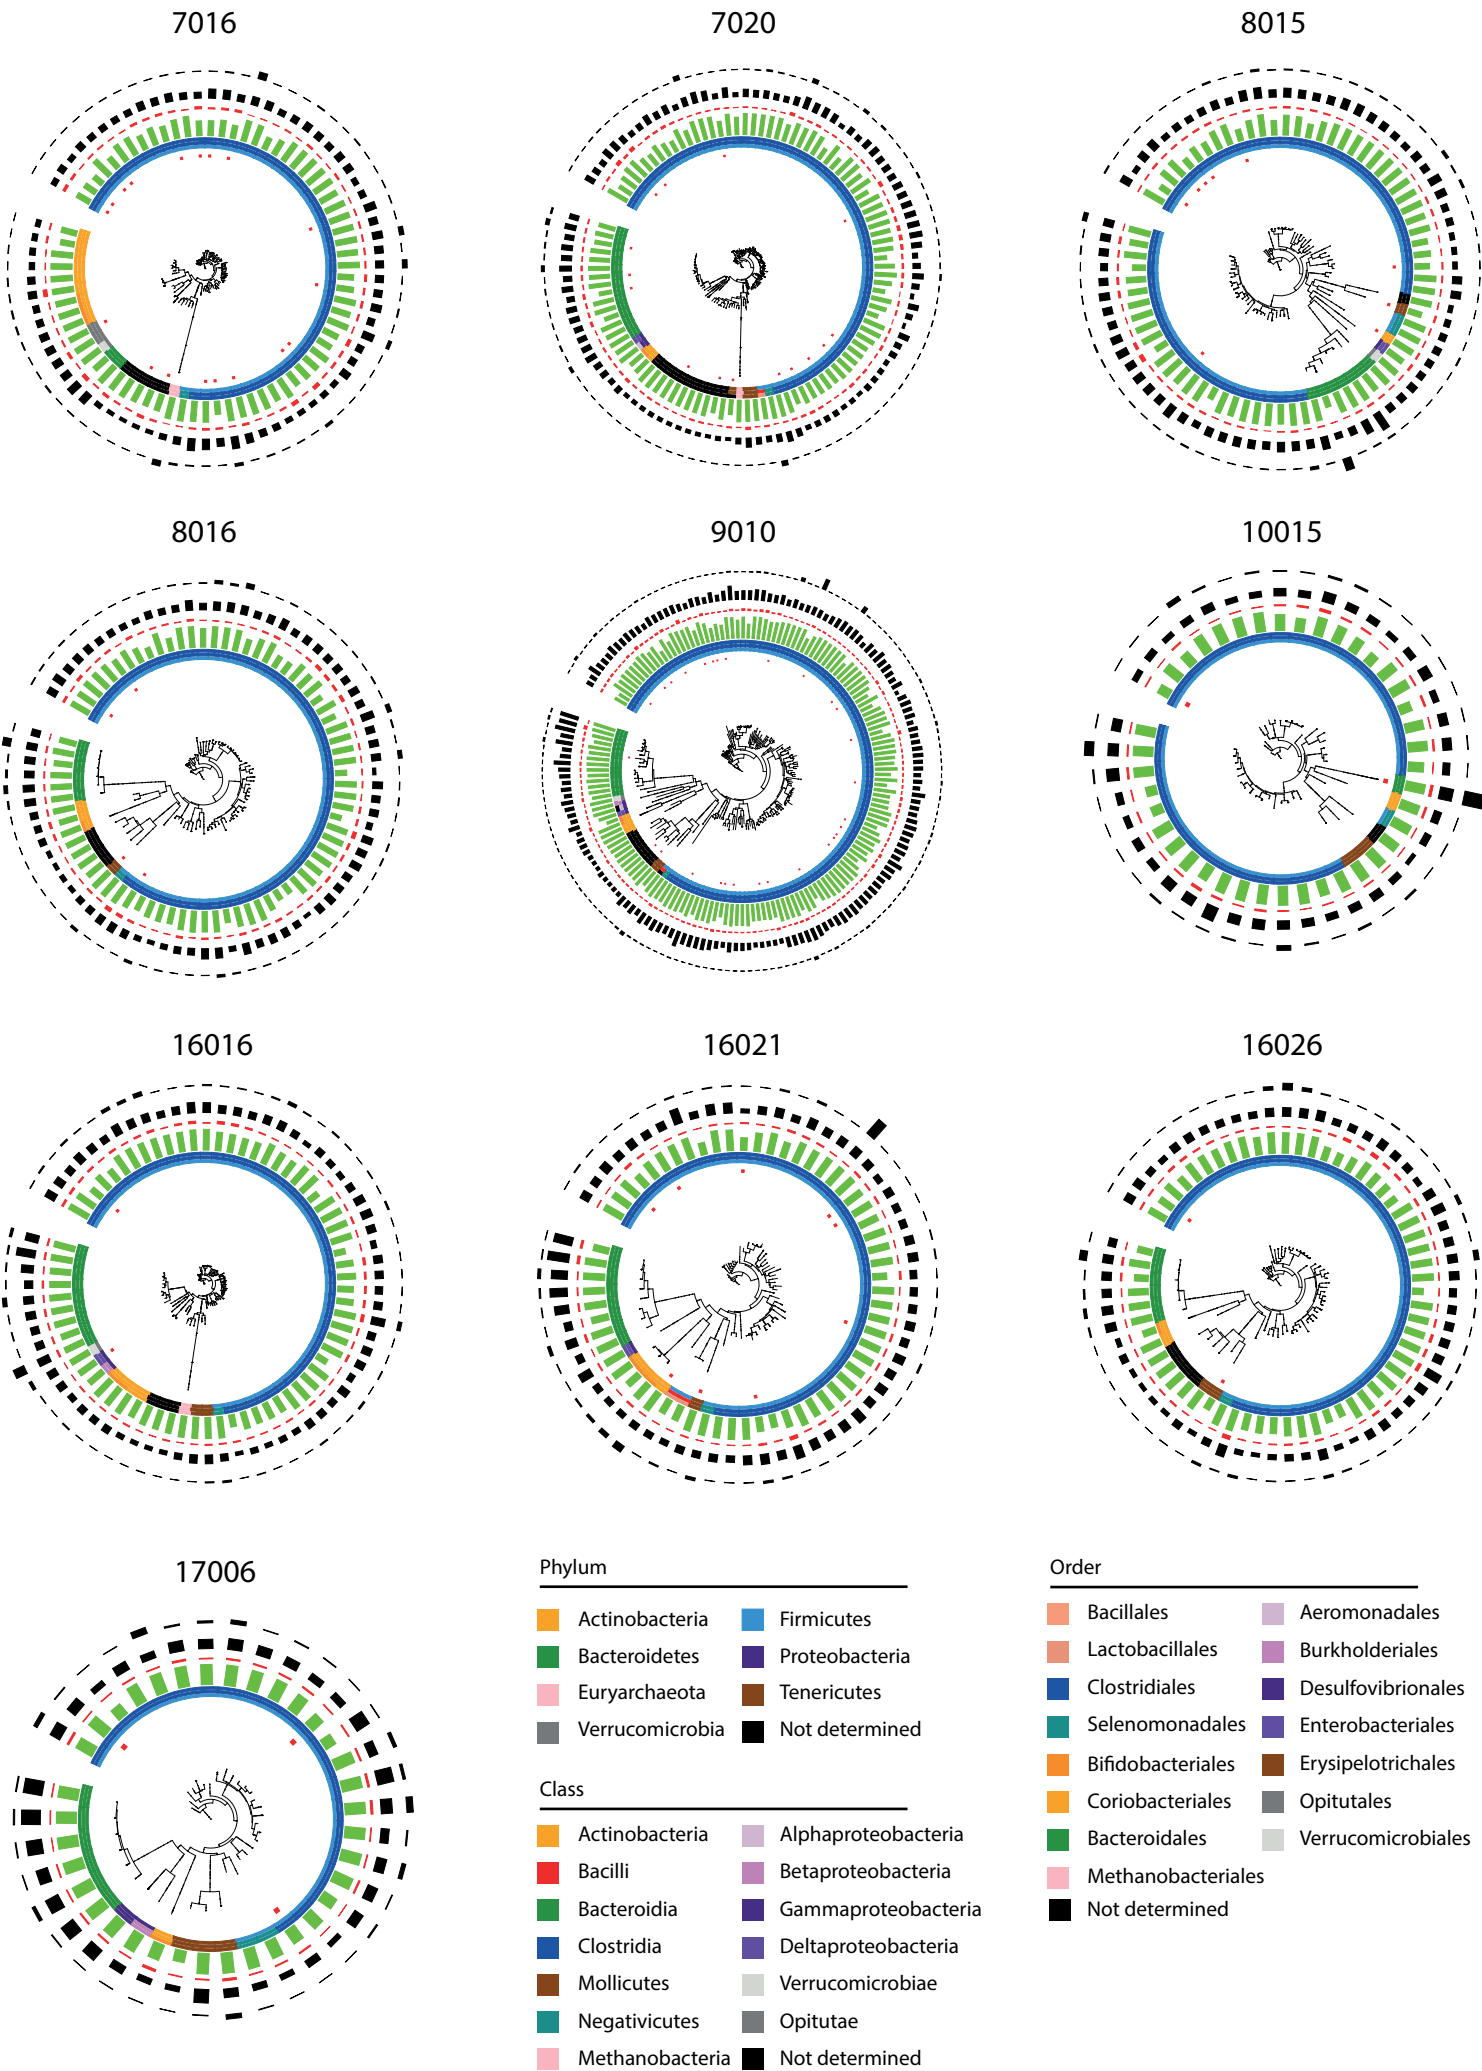

Supplement: supp [file elife-60608-supp-v1.zip]

**Figure 1 - figure supplement 3**

**a**

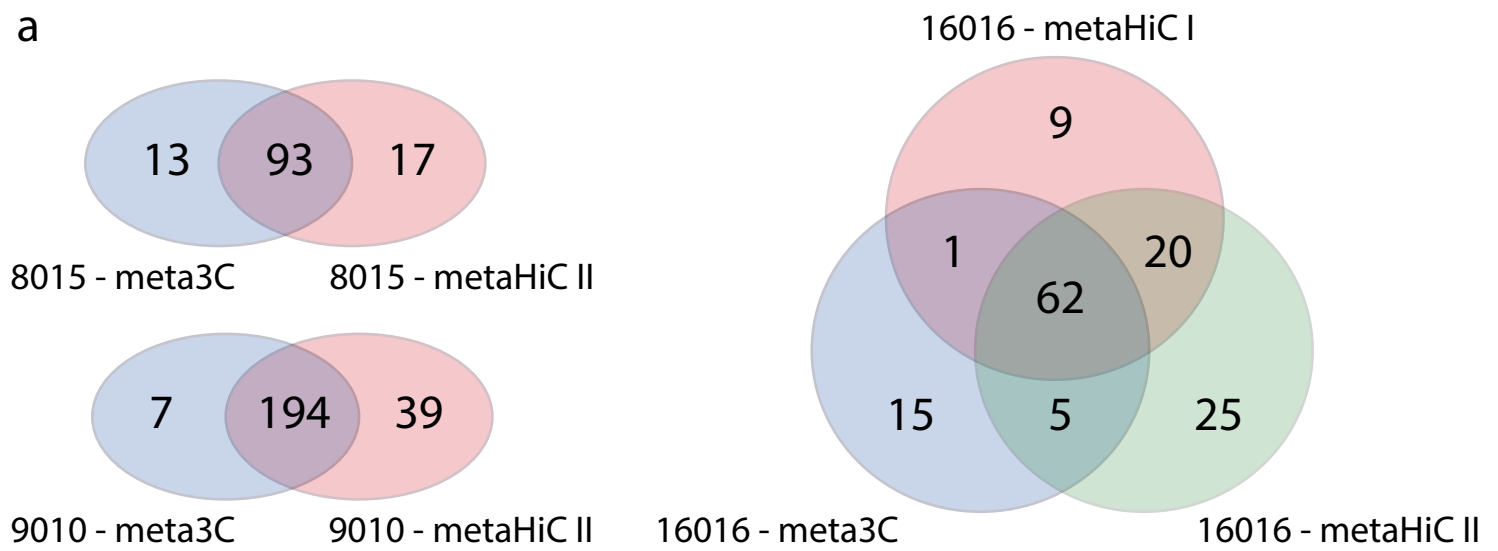

**b**

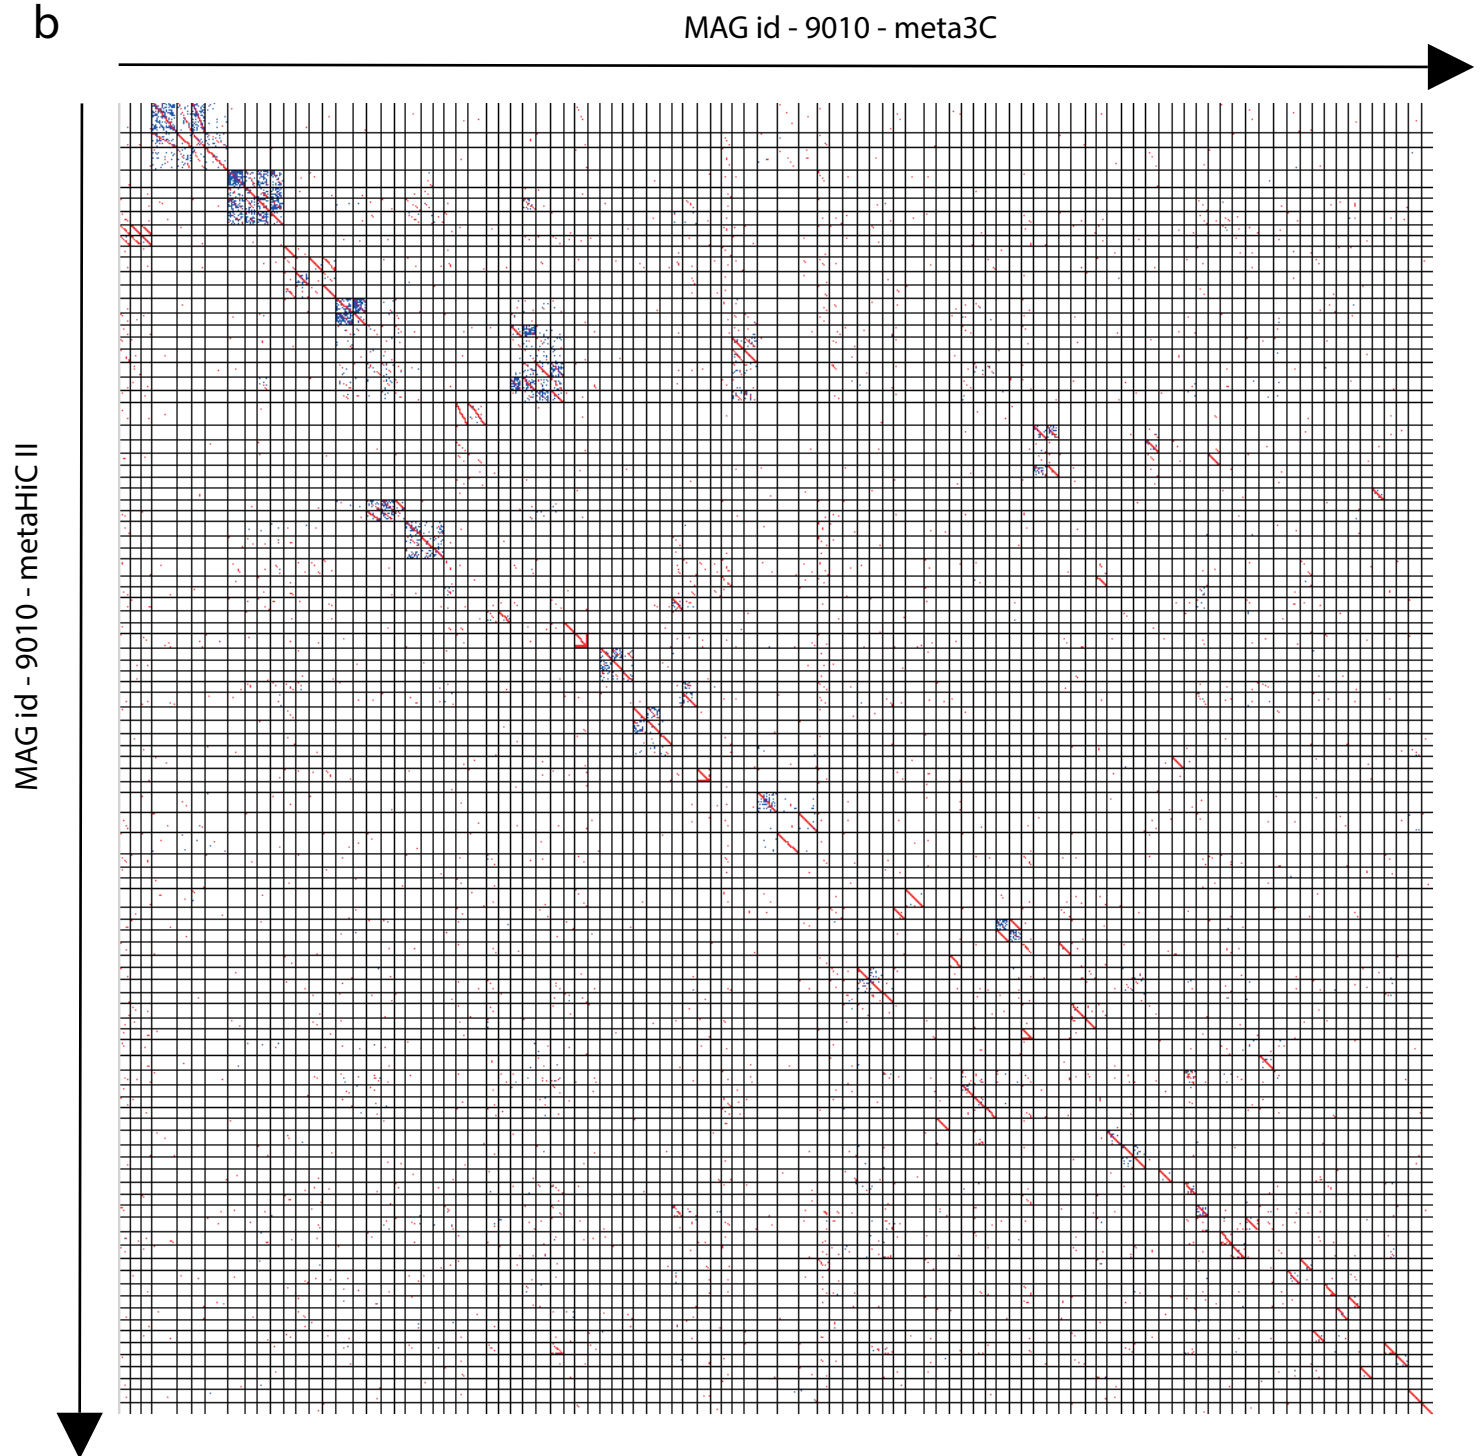

Supplement: supp [file elife-60608-supp-v1.zip]

Figure 2 - figure supplement 2

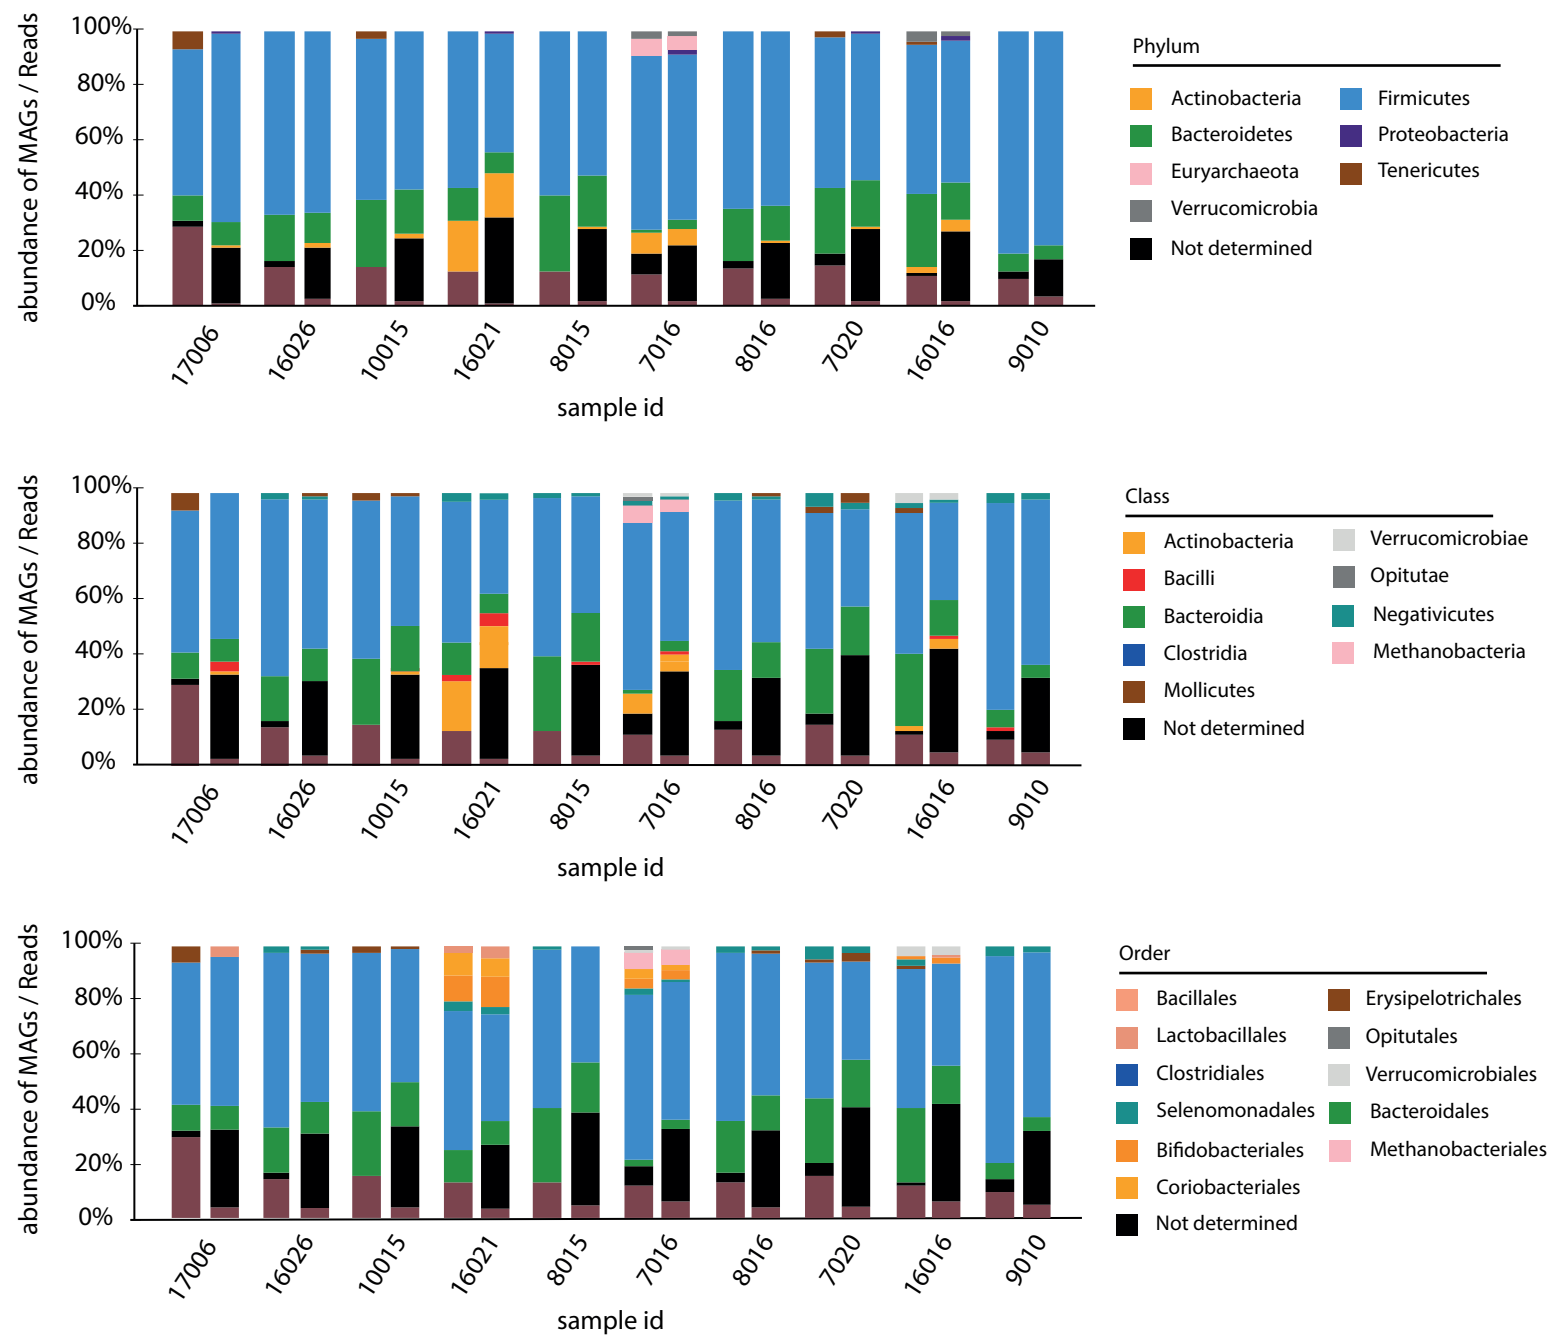

Supplement: supp [file elife-60608-supp-v1.zip]
